# Supplementary material
Source: publisher figshare collection journal article supplement (https://sage.figshare.com/ndownloader/files/15254324)
Supplement: Supplementary file 1 [file 15254324]

Supplementary Table 1. Distribution of study population by cohort. Any registration.

|                      | <b>Cohort 1</b>          | <b>Cohort 2</b>         | <b>Cohort 3</b>          | <b>Cohort 4</b>         | <b>Cohort 5</b>          | <b>Young men</b>        | <b>At least once</b>     |
|----------------------|--------------------------|-------------------------|--------------------------|-------------------------|--------------------------|-------------------------|--------------------------|
| Children             | 1001                     | 189                     | 654                      | 0                       | 488                      | 0                       | 2332                     |
| - <i>men</i>         | 498                      | 96                      | 351                      | -                       | 251                      | -                       | 1196                     |
| - <i>women</i>       | 503                      | 93                      | 303                      | -                       | 237                      | -                       | 1136                     |
| Young men            | 0                        | 0                       | 0                        | 0                       | 0                        | 263                     | 263                      |
| Mothers              | 980                      | 189                     | 638                      | 166                     | 504                      | 207                     | 2684                     |
| Fathers              | 0                        | 0                       | 0                        | 0                       | 282                      | 0                       | 282                      |
| Maternal grandmother | 0                        | 0                       | 0                        | 0                       | 337                      | 0                       | 337                      |
| Paternal grandmother | 0                        | 0                       | 0                        | 0                       | 201                      | 0                       | 201                      |
| <b>Total</b>         | <b>1981<sup>1)</sup></b> | <b>378<sup>1)</sup></b> | <b>1292<sup>1)</sup></b> | <b>166<sup>1)</sup></b> | <b>1812<sup>1)</sup></b> | <b>470<sup>1)</sup></b> | <b>6099<sup>2)</sup></b> |
| <i>Total, men</i>    | 498                      | 96                      | 351                      | 0                       | 533                      | 263                     | 1741                     |
| <i>Total, women</i>  | 1483                     | 282                     | 941                      | 166                     | 1279                     | 207                     | 4358                     |

Notes: 1) After the data cleaning some of these numbers differ slightly from those reported previously<sup>12,14</sup>; 2) This number is larger than 5773, as a given person could have participated in more than one cohort.

Supplementary Table 2. Distribution of study population by cohort. First registration.

|                       | <b>Cohort 1</b> | <b>Cohort 2</b> | <b>Cohort 3</b> | <b>Cohort 4</b> | <b>Cohort 5</b> | <b>Young men</b> | <b>First registration</b> |
|-----------------------|-----------------|-----------------|-----------------|-----------------|-----------------|------------------|---------------------------|
| Children              | 1001            | 189             | 654             | 0               | 488             | 0                | 2332                      |
| - <i>boys</i>         | 498             | 96              | 351             | -               | 251             | -                | 1196                      |
| - <i>girls</i>        | 503             | 93              | 303             | -               | 237             | -                | 1136                      |
| Young men             | 0               | 0               | 0               | 0               | 0               | 258              | 258                       |
| Mothers               | 980             | 155             | 579             | 142             | 450             | 159              | 2465                      |
| Fathers               | 0               | 0               | 0               | 0               | 265             | 0                | 265                       |
| Maternal grandmothers | 0               | 0               | 0               | 0               | 286             | 0                | 286                       |
| Paternal grandmothers | 0               | 0               | 0               | 0               | 167             | 0                | 167                       |
| <b>Total</b>          | <b>1981</b>     | <b>344</b>      | <b>1233</b>     | <b>142</b>      | <b>1656</b>     | <b>417</b>       | <b>5773</b>               |
| <i>Total, men</i>     | 498             | 96              | 351             | 0               | 516             | 258              | 1719                      |
| <i>Total, women</i>   | 1483            | 248             | 882             | 142             | 1140            | 159              | 4054                      |

Supplementary Table 3. Distribution of IBD cases and age range by cohort.

| <b>Cohort name</b>            | <b>UC</b>              | <b>CD</b>             | <b>IBD</b> | <b>Age range</b> |
|-------------------------------|------------------------|-----------------------|------------|------------------|
| Cohort 1                      |                        |                       |            |                  |
| - <i>mothers</i>              | 9                      | -                     | <b>9</b>   | 29-64            |
| - <i>children</i>             | 8                      | 3                     | <b>11</b>  | 11-31            |
| Cohort 2                      |                        |                       |            |                  |
| - <i>mothers</i>              | -                      | -                     | -          |                  |
| - <i>children</i>             | 3                      | -                     | <b>3</b>   | 17-21            |
| Cohort 3                      |                        |                       |            |                  |
| - <i>mothers</i>              | 1                      | 1                     | <b>2</b>   | 35               |
| - <i>children</i>             | -                      | -                     | -          |                  |
| Cohort 4                      | 1                      | -                     | <b>1</b>   | 37               |
| Cohort 5                      |                        |                       |            |                  |
| - <i>mothers</i>              | 2                      | -                     | <b>2</b>   | 20-35            |
| - <i>children</i>             | -                      | -                     | -          |                  |
| - <i>fathers</i>              | 2                      | -                     | <b>2</b>   | 32-41            |
| - <i>maternal grandmother</i> | 2                      | 1                     | <b>3</b>   | 52-67            |
| - <i>paternal grandmother</i> | -                      | -                     | -          |                  |
| Young men                     | 2                      | -                     | <b>2</b>   | 25-30            |
| - <i>mothers of young men</i> | 2                      | -                     | <b>2</b>   | 56-58            |
| <b>Total</b>                  | <b>32<sup>1)</sup></b> | <b>5<sup>2)</sup></b> | <b>37</b>  | <b>11-67</b>     |

Notes: Montreal classification<sup>18</sup> for UC 1) 18 persons had E1, five had E2 and nine with E3; for CD 2) one person had L2 and B1, two had L3 and B2, one had L3 and B3 and one had L2 and B2. None had perianal disease.
